# Supplementary material for: A chimeric platelet-targeted urokinase prodrug selectively blocks new thrombus formation
Source: JCI journal article supplement (doi:10.1172/jci81470), 2015-12-20
Supplement: sd1 [file 1]

301 Moved Permanently

# Moved Permanently

The document has moved here.
